# Supplementary material for: Placenta-derived Extracellular Vesicles in Maternal Plasma of Hb Bart’s Fetuses
Source: Research Square preprint supplement (doi:10.21203/rs.3.rs-4163008/v1), 2024-04-17
Supplement: Supplementary file 1 [file 3d2cde8a36bd6405a13e28e7.xlsx]

## Sheet: Sheet1
Proteins identified at FDR<1%	Disease comparators						Hydrops due to other causes				Normal pregnancy												Bart hydrops						Bart no hydrops
	Control16_SWATH1	Control16_SWATH2	Control18_SWATH1	Control18_SWATH2	Control28_SWATH1	Control28_SWATH2	NonBart10_SWATH1	NonBart10_SWATH2	NonBart20_SWATH1	NonBart20_SWATH2	NonBart2_SWATH1	NonBart2_SWATH2	NonBart4_SWATH1	NonBart4_SWATH2	NonBart19_SWATH1	NonBart19_SWATH2	NonBart25_SWATH1	NonBart25_SWATH2	NonBart34_SWATH1	NonBart34_SWATH2	NonBart36_SWATH1	NonBart36_SWATH2	Bart3_SWATH1	Bart3_SWATH2	Bart24_SWATH1	Bart24_SWATH2	Bart26_SWATH1	Bart26_SWATH2	Bart7_SWATH1	Bart7_SWATH2	Bart23_SWATH1	Bart23_SWATH2	Bart33_SWATH1	Bart33_SWATH2	Bart55_SWATH1	Bart55_SWATH2
sp|B9A064|IGLL5_HUMAN_group_Immunoglobulin lambda-like polypeptide 5 OS=Homo sapiens OX=9606 GN=IGLL5 PE=2 SV=2	486780	404680	37302	273610	3549.3	242040	26422	15852	32837	51811	21702	88865	15228	668.74	4711.6	1472	476340	35193	584.32	69589	0	563.34	35981	2536.7	3739.4	4456.1	624.83	7543.7	60063	8122.3	7769	2224.8	0	3379.3	35622	740.77
sp|P00736|C1R_HUMAN_group_Complement C1r subcomponent OS=Homo sapiens OX=9606 GN=C1R PE=1 SV=2	117360	97201	41878	10526	41395	18076	18070	14554	40252	23815	16018	20101	38373	6978.7	13703	15575	33878	49420	18468	20686	1235.3	8233.7	23162	18049	31040	7797.6	6957.5	37178	31672	23730	18407	16775	10169	22700	37405	20983
sp|P00738|HPT_HUMAN_group_Haptoglobin OS=Homo sapiens OX=9606 GN=HP PE=1 SV=1	37124	16312	14825	22535	3206.4	29705	21343	8829.8	18358	22339	61072	12149	36732	22434	3551.8	96060	27043	31974	25415	12347	21508	33021	134190	42976	12283	7119.4	13570	51214	32941	33464	54032	62383	43632	50956	199650	172380
sp|P02671|FIBA_HUMAN_group_Fibrinogen alpha chain OS=Homo sapiens OX=9606 GN=FGA PE=1 SV=2	2008200	1208700	106600	1152900	180600	32591	135110	33578	30535	70206	18193	47808	32117	14393	107390	21713	453090	157680	14240	107270	39674	16802	181940	60493	36840	15227	31430	55711	164770	295780	822610	86034	7273.4	23454	184160	88025
sp|P02675|FIBB_HUMAN_group_Fibrinogen beta chain OS=Homo sapiens OX=9606 GN=FGB PE=1 SV=2	141960	145560	137040	136930	51225	53853	142820	21659	48076	59659	10989	37645	26198	7214.5	40213	51378	28798	22120	8885.5	47643	5059.6	10110	57374	28627	53418	47555	45556	45068	42468	44518	35694	27156	6995.5	15658	105080	30858
sp|P02679|FIBG_HUMAN_group_Fibrinogen gamma chain OS=Homo sapiens OX=9606 GN=FGG PE=1 SV=3	309380	43257	80897	528660	132260	22773	109720	146810	31393	51477	18988	45958	73915	36550	18581	42353	55662	49460	46588	73024	48371	30192	31568	145540	56578	17594	31072	62351	59329	48381	98819	47727	25537	18598	110740	85853
sp|P02745|C1QA_HUMAN_group_Complement C1q subcomponent subunit A OS=Homo sapiens OX=9606 GN=C1QA PE=1 SV=2	16639	1052.3	5829.1	24857	1182.7	1596.1	691.14	1133.6	639.37	620.66	234.23	0	4275.2	207.04	796.16	4878.6	2011.3	1561.3	1014	3509	0	1371.6	3547.8	7355.2	632.93	827.08	0	1222.5	4244.3	4050.7	1112.8	350.53	590.4	0	2276.3	2908.3
sp|P04114|APOB_HUMAN_group_Apolipoprotein B-100 OS=Homo sapiens OX=9606 GN=APOB PE=1 SV=2	299250	94838	156270	537220	116590	64062	84760	68883	105140	49341	64151	79587	33676	32866	138640	161250	71491	68577	44439	90223	26442	25204	74670	102670	98526	77769	37845	77636	51365	78056	136500	50136	65418	23305	81177	59303
sp|P04259|K2C6B_HUMAN_group_Keratin, type II cytoskeletal 6B OS=Homo sapiens OX=9606 GN=KRT6B PE=1 SV=5	9150.2	4898.6	6902.1	9029.3	8457.8	7275.1	8393.9	8734.7	5042.9	7240	10301	45597	5004.8	10559	2482.3	15156	7174.1	5295.5	3359	3553.6	1179.1	4512.4	42092	9602.4	20481	23840	18886	36100	3063.3	8374	12011	4200.2	6047.2	13745	14762	20211
sp|P06312|KV401_HUMAN_group_Immunoglobulin kappa variable 4-1 OS=Homo sapiens OX=9606 GN=IGKV4-1 PE=1 SV=1	15735	8116.2	2995.7	33179	8671.1	4260.2	4452.5	2154.2	3241.2	3883.6	534.43	5740.7	572.03	0	6638	22295	9849.6	6285	3020.6	908.81	1084.3	3880.9	0	563.87	3152.8	5235.7	3121.7	1471.3	4828.3	10853	19659	19014	0	469.28	17049	25599
sp|P08519|APOA_HUMAN_group_Apolipoprotein(a) OS=Homo sapiens OX=9606 GN=LPA PE=1 SV=1	144130	77651	37360	85898	33474	21958	49133	10873	8879.4	12516	12832	22096	33005	7125.2	12149	58555	90813	12725	7030.8	13526	9087.8	16596	44479	8372.4	31097	20140	37232	17523	15383	12714	19593	7137.8	17735	16028	29179	24814
sp|P0DOX2|IGA2_HUMAN_group_Immunoglobulin alpha-2 heavy chain OS=Homo sapiens OX=9606 PE=1 SV=2	3968.8	8795.5	6708.5	8657.2	7219.8	2930	2193.9	2994.4	2610.9	1028.2	1912.8	1642.8	1415.4	1053.8	6066.3	4249.2	6189.9	5093.5	3497.6	2145.6	6884.7	2542	19176	18768	26849	1142.4	6625.1	9214.2	2574.1	2186.8	7253.6	2038.6	3220.3	1265	24929	6577.4
sp|P11142|HSP7C_HUMAN_group_Heat shock cognate 71 kDa protein OS=Homo sapiens OX=9606 GN=HSPA8 PE=1 SV=1	0	0	1247.9	164.72	0	3412.2	1809.7	1878.2	4761.8	0	4275.4	4963.9	1751.1	1400	1127.4	0	367.65	36123	3914	1810.5	642.96	0	45332	8451.4	16926	346	11364	6691.6	733.86	496.26	0	2249.8	611.52	1014	0	2578.7
sp|P22626|ROA2_HUMAN_group_Heterogeneous nuclear ribonucleoproteins A2_B1 OS=Homo sapiens OX=9606 GN=HNRNPA2B1 PE=1 SV=2	804.1	985.41	0	0	2226.6	1245.1	2400.7	2052.3	1370.1	1474.4	798.41	1282.4	4463.9	1162.9	2516.3	0	1464.6	1954	2462.9	4191.7	908.08	0	3697.5	4374.2	3394.2	568.07	9042.4	11603	483.61	1180.4	0	545.99	2505.2	2118.6	0	2365.2
sp|P81605|DCD_HUMAN_group_Dermcidin OS=Homo sapiens OX=9606 GN=DCD PE=1 SV=2	10560	1448.8	953.11	752.18	11136	582.28	0	478.61	639.4	0	591.73	1074	950.09	1041.1	0	2670.8	901.12	3612.7	1361.7	787.41	2063.7	2335.1	8616.1	7074.4	6459.4	6065.1	3140.8	1955.8	429.04	3655.3	6458.1	2723	1796.6	629.66	3574.8	10648
sp|Q86YZ3|HORN_HUMAN_group_Hornerin OS=Homo sapiens OX=9606 GN=HRNR PE=1 SV=2	0	0	295.49	262.57	7340.5	25285	14997	13790	18146	0	7305.5	12297	4795.8	8502.5	12030	0	367.9	30083	10463	12120	6458.3	0	62974	29346	4973.4	2498.8	31019	38074	1497.2	5838.7	0	9780.4	8928.2	14072	0	5423.6
sp|A0A075B6H7|KV37_HUMAN_group_Probable non-functional immunoglobulin kappa variable 3-7 OS=Homo sapiens OX=9606 GN=IGKV3-7 PE=1 SV=1	2239.2	1037.8	2250.1	2859.6	0	629.15	0	789.74	0	1310.4	0	0	2399.1	0	0	1397	0	0	3052.2	609.87	0	0	0	845.47	0	0	0	1557.1	1463	2632.1	2307.5	305.73	0	0	7363.2	0
sp|A0A075B6H9|LV469_HUMAN_group_Immunoglobulin lambda variable 4-69 OS=Homo sapiens OX=9606 GN=IGLV4-69 PE=1 SV=1	864.13	287.48	4964.7	4535.1	0	4823.3	1552.9	3398.6	4469.1	0	2716.9	31657	14631	19303	647.23	0	508.44	10828	13849	9303	16793	463.95	26075	17657	20552	465.47	4693.8	17223	19270	6070.1	0	1168.2	12633	6515.3	0	3517.9
sp|A0A075B6I4|LVX54_HUMAN_group_Immunoglobulin lambda variable 10-54 OS=Homo sapiens OX=9606 GN=IGLV10-54 PE=3 SV=1	2544.7	862.38	936.57	1668	3260.3	1032.4	1321	845.29	1838.3	0	6555.6	0	3264	2789.4	3265.6	0	4288.3	1865.4	1539.2	9211.4	2525	0	17334	3002.5	12444	416.55	4261.8	0	11306	8766.1	0	3718.9	1927	779.31	0	9666.9
sp|A0A0B4J1V0|HV315_HUMAN_group_Immunoglobulin heavy variable 3-15 OS=Homo sapiens OX=9606 GN=IGHV3-15 PE=3 SV=1	12596	4818.3	2801.2	4547.4	5230.1	17014	5566	13833	1071.8	1658.2	0	35570	1257.8	0	2730.3	7599.7	11759	6067.2	1502.8	2702.2	908	547.38	2391.5	17079	1546	10433	1548.5	10171	3420.1	9594.4	34603	11538	2903.8	0	13653	2592.7
sp|A0A0C4DH68|KV224_HUMAN_group_Immunoglobulin kappa variable 2-24 OS=Homo sapiens OX=9606 GN=IGKV2-24 PE=3 SV=1	21903	2337	28790	6312.3	7451.5	2560.6	11201	3307.3	0	6754.7	0	8755.4	8995	5808.9	1985.5	33223	2590.8	7667.4	3396	0	2845.3	15947	1925.5	6930.7	2389.6	4591.8	0	41556	7862.6	7364.2	29518	3270.4	13460	24229	38138	7595.9
sp|A0M8Q6|IGLC7_HUMAN_group_Immunoglobulin lambda constant 7 OS=Homo sapiens OX=9606 GN=IGLC7 PE=1 SV=3	44991	21114	7059.3	7785.4	16125	12878	19696	2198.3	19231	1826.5	7213.7	3762.3	10149	25007	14852	0	4371.3	8683.1	19065	21142	8222.8	7086.2	43309	16165	8006	8056.9	13125	977.85	25432	7008.6	4781.8	15945	8546.8	6997.6	1980.8	9097.8
sp|O14791|APOL1_HUMAN_group_Apolipoprotein L1 OS=Homo sapiens OX=9606 GN=APOL1 PE=1 SV=5	948.12	1113.2	363.25	5128	934.53	0	1142.2	628.87	5151	163.96	697.53	1385	1327.9	537.64	0	1448	7394.3	1115.3	0	728.84	0	0	1932.3	1127.7	893.35	675.69	2915.6	4696.1	397.13	370.37	2069.7	483.16	0	1677.9	6104.7	740.81
sp|O43866|CD5L_HUMAN_group_CD5 antigen-like OS=Homo sapiens OX=9606 GN=CD5L PE=1 SV=1	55859	66756	10149	20108	17815	51194	48996	15086	66151	18249	5240.6	29926	54758	8390.6	72544	62602	72715	34727	37710	22938	5960.8	18958	13748	22195	23285	26848	15185	60731	18069	18205	25410	18909	12732	18938	38390	41651
sp|O75636|FCN3_HUMAN_group_Ficolin-3 OS=Homo sapiens OX=9606 GN=FCN3 PE=1 SV=2	25236	16724	17017	7039.4	36044	5434.9	37255	19178	19280	6404.9	8468.7	8589.2	25926	40914	5548.8	17999	22741	36321	51954	65481	34231	18057	168840	116730	15388	16808	48576	12100	31375	27312	14816	21280	28521	16438	33574	26008
sp|P00739|HPTR_HUMAN_group_Haptoglobin-related protein OS=Homo sapiens OX=9606 GN=HPR PE=2 SV=2	6178.2	1054	1690.9	23670	0	0	4380	7538.4	0	2406.9	0	0	11638	358.77	0	7571.7	2115.4	2116.2	0	0	0	16510	0	4960.6	0	1056.8	0	13604	1076.8	1492.5	21498	3339.3	0	17405	28239	10296
sp|P01023|A2MG_HUMAN_group_Alpha-2-macroglobulin OS=Homo sapiens OX=9606 GN=A2M PE=1 SV=3	52763	13884	29403	137870	45138	45286	44045	16324	8016.7	28453	7054.2	17052	52921	58428	51156	71457	74787	62508	31498	95762	9586.8	9981.2	43074	31112	24095	22513	9669.9	83493	29195	45691	44872	58398	36420	19717	76024	42601
sp|P01024|CO3_HUMAN_group_Complement C3 OS=Homo sapiens OX=9606 GN=C3 PE=1 SV=2	933.93	5576.6	665.05	537.45	1367.9	0	0	1226.8	1389	0	2398.6	0	0	0	3014.6	3181.5	571.27	1093	1071.5	1958.5	697.86	463.98	0	539.29	1184	852.16	0	0	581.02	585.32	3693.6	611.39	944.9	0	2686	4492.2
sp|P01591|IGJ_HUMAN_group_Immunoglobulin J chain OS=Homo sapiens OX=9606 GN=JCHAIN PE=1 SV=4	7924.6	4225.9	4464.7	9401.8	25054	3769.8	2342	5828.5	5675.2	477.53	2067.8	7962.9	1618.2	861.83	31226	2162.1	3719.5	13716	678.68	34288	301.1	3494.7	1702.7	1407.7	28198	2605.5	3806	454.65	595.62	3700.4	12375	912.91	1078.4	6177.5	17229	6170.7
sp|P01615|KVD28_HUMAN_group_Immunoglobulin kappa variable 2D-28 OS=Homo sapiens OX=9606 GN=IGKV2D-28 PE=1 SV=2	2018.2	598	1311.9	3477.8	0	2085	737.49	629.28	0	3243.4	0	1415.3	1612	0	0	18101	1482.2	522.38	0	0	1050.6	3641	0	506.22	0	364.49	0	3169.7	5473.8	1565.1	6446.2	482.96	478.46	469.22	11200	1524.2
sp|P01619|KV320_HUMAN_group_Immunoglobulin kappa variable 3-20 OS=Homo sapiens OX=9606 GN=IGKV3-20 PE=1 SV=2	35523	3050.9	10187	43565	13805	4868.2	42965	5059.9	10435	7425.3	4986.8	6368.5	8097.1	15734	1375	20071	6138.2	2195.8	6014.9	35706	2774.7	7199.8	15304	7278.3	2043.1	787.63	0	9425.6	13118	35499	25750	10957	2970.8	8740.1	24251	4656.6
sp|P01700|LV147_HUMAN_group_Immunoglobulin lambda variable 1-47 OS=Homo sapiens OX=9606 GN=IGLV1-47 PE=1 SV=2	1657.3	2050.4	659.25	1682.2	638.87	4270.7	1442.2	631.5	7076	0	826.79	1048.5	8807.9	16486	744.98	0	1291.9	1086.7	5954.4	2197	502.09	695.97	1791.7	2064.3	9070.7	437.38	4826.9	0	1177.8	2203.6	0	1448.1	8619.8	3480	2122.4	1878.5
sp|P01717|LV325_HUMAN_group_Immunoglobulin lambda variable 3-25 OS=Homo sapiens OX=9606 GN=IGLV3-25 PE=1 SV=2	33591	4762.8	3224.3	6169	3521.8	32211	6152.6	4468	7056.9	13902	1620.7	10410	3330	734.29	27660	2197.7	16715	3630.6	10096	19061	3593.6	7356.8	4538.6	5283	8864.2	38357	1086.7	9989.3	2388.3	7012.5	6611.5	2108.8	3049.5	10857	17271	9735.9
sp|P01860|IGHG3_HUMAN_group_Immunoglobulin heavy constant gamma 3 OS=Homo sapiens OX=9606 GN=IGHG3 PE=1 SV=2	19597	2462.1	4502.9	37802	11048	1357.4	3168.9	1435	3811.2	1737.4	947.77	815.95	412.95	1049.1	12684	13353	7384.1	29395	4025.7	6183.9	5738	3081.4	9377.5	22552	3371.8	5142.7	2099.2	488.99	4488.6	6301.4	7889.2	14751	3974	633.24	16420	15024
sp|P01871|IGHM_HUMAN_group_Immunoglobulin heavy constant mu OS=Homo sapiens OX=9606 GN=IGHM PE=1 SV=4	145810	48202	35115	56503	50712	93177	19979	22674	33291	61745	61222	32164	28537	16643	40800	42170	114110	46838	40018	81464	15148	12051	82370	41442	42623	20873	25439	55562	45110	57286	49325	30628	13260	18155	70581	41922
sp|P01876|IGHA1_HUMAN_group_Immunoglobulin heavy constant alpha 1 OS=Homo sapiens OX=9606 GN=IGHA1 PE=1 SV=2	35865	15482	29907	61141	9214	25166	18137	4526.8	24667	4855.4	6207.9	11310	8813	22794	28407	20767	17394	15781	7344.6	14620	11471	10427	27810	5748.9	19756	47569	63533	10430	28164	43876	47532	9759	10813	3788	32326	25497
sp|P02533|K1C14_HUMAN_group_Keratin, type I cytoskeletal 14 OS=Homo sapiens OX=9606 GN=KRT14 PE=1 SV=4	97886	7147.8	10948	37406	25342	41200	19605	6503.8	24475	26529	15678	16926	34508	6549	36197	68196	21917	17973	6941.8	6099.7	15292	6692.5	42304	11341	8442	20192	14332	69704	3993.4	10775	83890	19193	11265	92027	40721	30247
sp|P02538|K2C6A_HUMAN_group_Keratin, type II cytoskeletal 6A OS=Homo sapiens OX=9606 GN=KRT6A PE=1 SV=3	15552	6140.5	4055.1	39429	13837	3460.1	76415	5656.2	856.12	7085.2	16280	13636	9812.2	1224.7	2158	14655	11528	4363	964.14	4309.3	0	2605.7	34385	3036	2849.2	1303.2	903.55	20768	1732.4	2721	7372.9	5864.9	1078.5	9718.8	37662	18091
sp|P02647|APOA1_HUMAN_group_Apolipoprotein A-I OS=Homo sapiens OX=9606 GN=APOA1 PE=1 SV=1	119800	28066	47789	359920	65647	21817	23287	6071.9	9656.8	24022	17111	37927	26686	14459	21810	43762	112390	34367	41143	20088	25628	10929	36118	23885	13314	23678	7146	75079	10753	13540	53371	25515	24654	8902.2	77397	22794
sp|P02649|APOE_HUMAN_group_Apolipoprotein E OS=Homo sapiens OX=9606 GN=APOE PE=1 SV=1	109030	43890	38416	180120	76860	68403	45716	24584	29135	45031	31636	34106	50171	14612	101980	61231	99160	50749	46322	44175	34617	26172	61196	61529	34090	30090	32440	183140	33582	32825	236290	34615	25377	32047	83515	71835
sp|P02652|APOA2_HUMAN_group_Apolipoprotein A-II OS=Homo sapiens OX=9606 GN=APOA2 PE=1 SV=1	5860.4	3002.2	2695.3	16859	4376.7	778.85	1981.3	3382.1	2179.1	601.19	3943.2	299.64	2200.2	1816.2	1344.6	22056	11350	30084	6688	2263.8	12020	1730.6	1318.2	2191.7	19386	1728.6	2151.7	488.99	1532	8178.7	12374	2501.1	5588.7	209.42	8108.5	15695
sp|P02654|APOC1_HUMAN_group_Apolipoprotein C-I OS=Homo sapiens OX=9606 GN=APOC1 PE=1 SV=1	5446.7	510.25	1590.4	1018.3	0	0	0	0	0	566.96	0	0	1282	0	0	3565.9	3481.4	1337.9	0	0	672.22	2937	0	936.53	0	650.12	0	1508.7	627.34	740.76	3571.1	2047.2	0	469.28	5468.1	669.55
sp|P02655|APOC2_HUMAN_group_Apolipoprotein C-II OS=Homo sapiens OX=9606 GN=APOC2 PE=1 SV=1	123330	22474	40384	49944	61753	18752	61583	28536	3038.8	11180	9521.5	27670	23523	7964.8	49278	107400	114750	102930	30776	27871	7287.9	25363	54139	28046	14378	19522	67187	17374	37681	19607	210450	28958	25711	14507	174330	41669
sp|P02656|APOC3_HUMAN_group_Apolipoprotein C-III OS=Homo sapiens OX=9606 GN=APOC3 PE=1 SV=1	53072	4598.2	59384	32930	26774	24376	13920	11309	48651	12566	9373.5	7453.6	25190	5821.2	18478	31431	26129	13673	20100	19159	7188.3	13462	14377	60398	48552	8811.8	8651	21790	15008	9054.3	343490	8903.7	14930	9548	46738	44194
sp|P02746|C1QB_HUMAN_group_Complement C1q subcomponent subunit B OS=Homo sapiens OX=9606 GN=C1QB PE=1 SV=3	9205.5	4332.1	11329	10317	1000.5	8120.8	6063.5	16005	436.83	24700	1005.3	3827.9	22475	9825.6	932.99	10461	4443	7577.5	714.72	1842.6	4492.7	36011	2382.2	8882.9	4947	9229.1	0	61229	8496.8	4486.8	42271	20953	7382.8	23222	42404	37775
sp|P02747|C1QC_HUMAN_group_Complement C1q subcomponent subunit C OS=Homo sapiens OX=9606 GN=C1QC PE=1 SV=3	14792	7706.6	33633	30260	4688.2	13868	6453.4	4807.7	4037.5	8736.9	8493.6	5226.5	16367	5646.7	2743.4	33207	10779	8972.9	1683.9	7264.4	842.26	2814	12703	6941.4	5485.3	7874.5	3190.5	26583	20765	9242.5	11327	4109	242.57	7772	27067	9717.2
sp|P02751|FINC_HUMAN_group_Fibronectin OS=Homo sapiens OX=9606 GN=FN1 PE=1 SV=5	120830	49737	30946	34175	36608	52790	45223	19978	87792	28023	6984.9	27546	840680	33852	26291	27213	32615	45866	13572	38438	366270	24214	43614	109070	2723500	29975	54091	57405	29318	20701	87465	21066	14069	47500	89957	116420
sp|P02768|ALBU_HUMAN_group_Albumin OS=Homo sapiens OX=9606 GN=ALB PE=1 SV=2	69900	13635	11658	56364	9066.1	15443	35221	7404.5	2304.3	19333	5307.2	24110	49984	17193	41293	31135	32027	33083	29768	17998	17289	19602	19159	18950	7922.5	35425	22172	30130	22414	23132	55804	31380	12253	14693	43058	24571
sp|P02787|TRFE_HUMAN_group_Serotransferrin OS=Homo sapiens OX=9606 GN=TF PE=1 SV=3	11047	2611.8	7735.2	5424.8	2669.9	6647.5	3168	3930.3	765.01	3757.2	1539.7	4759.2	5356.1	1999.9	4193.4	8199.1	4070.7	2703.4	2757	1821.5	1077.1	2272.8	2740.2	2479.3	4621.5	1495.2	6662.8	2162.4	1715.7	2708.9	2621.4	1640.4	1178.8	3530.8	8759.4	8131.2
sp|P04003|C4BPA_HUMAN_group_C4b-binding protein alpha chain OS=Homo sapiens OX=9606 GN=C4BPA PE=1 SV=2	243900	37588	69943	78677	74561	275290	82333	50144	34798	84487	47014	93130	298760	57514	54265	68131	141970	80824	88625	60369	48341	45042	125430	85111	115290	23093	18675	119190	33569	60308	51784	46704	75936	34974	85543	53877
sp|P04264|K2C1_HUMAN_group_Keratin, type II cytoskeletal 1 OS=Homo sapiens OX=9606 GN=KRT1 PE=1 SV=6	105510	43434	23056	51573	137720	33531	23025	23816	23303	115500	15643	46655	102970	7321.4	136930	23135	39712	47271	47968	44397	18698	47696	58110	22674	23659	39286	27348	49308	118050	45662	35279	49144	63262	13806	164630	40610
sp|P04275|VWF_HUMAN_group_von Willebrand factor OS=Homo sapiens OX=9606 GN=VWF PE=1 SV=4	145870	48489	42716	17512	86686	13034	10249	29384	68943	7128.4	18709	152570	38835	13605	14070	19517	747990	29114	33301	83279	9815.3	9880.3	35745	8983.7	13628	249200	151250	869860	10115	73663	102210	34527	22599	15249	73494	67377
sp|P04406|G3P_HUMAN_group_Glyceraldehyde-3-phosphate dehydrogenase OS=Homo sapiens OX=9606 GN=GAPDH PE=1 SV=3	0	0	0	0	0	4466.4	903.68	0	5269.6	0	416.7	1326.4	0	537.94	398.77	0	0	2610.7	3053.8	8874.9	1162.8	0	6831.4	1988.5	0	230.64	3945.6	1611.5	0	0	0	305.69	0	2532.3	0	0
sp|P04432|KVD39_HUMAN_group_Immunoglobulin kappa variable 1D-39 OS=Homo sapiens OX=9606 GN=IGKV1D-39 PE=3 SV=2	26268	3104.3	14071	5329	11644	5217.9	18590	3859.5	2733.5	2120.5	2311.9	7201.4	4473.4	1531.2	19757	15122	11503	991.14	3360.3	4434.5	7667.5	11658	5218.7	4304.6	10819	2541.6	0	11547	3431.8	15244	11371	4523.6	29238	4113.2	7882	16542
sp|P04433|KV311_HUMAN_group_Immunoglobulin kappa variable 3-11 OS=Homo sapiens OX=9606 GN=IGKV3-11 PE=1 SV=1	2816.3	87.618	857.59	13562	0	0	2595.9	0	0	11758	0	0	0	0	0	19840	8130.8	0	0	0	0	3427.2	0	0	0	0	0	0	7755.8	7049.8	14443	0	0	0	12814	0
sp|P05090|APOD_HUMAN_group_Apolipoprotein D OS=Homo sapiens OX=9606 GN=APOD PE=1 SV=1	78868	130980	16552	64586	30862	30999	159230	27755	23255	33131	22241	22350	14463	14370	21698	56513	46353	84169	23356	26269	14983	15741	76494	67233	27514	20698	44112	22393	30908	29943	69454	23169	12672	28813	110210	94646
sp|P05156|CFAI_HUMAN_group_Complement factor I OS=Homo sapiens OX=9606 GN=CFI PE=1 SV=2	13320	5844.3	0	574.16	46119	20681	3071	26185	894.09	2772.2	2706.7	2339.6	2620.4	0	32799	21301	1017.3	12147	14842	2784.9	4851.7	2637.7	16100	1508	54414	690.27	15138	7969.4	3284.3	14582	0	1554.6	5040.8	4585.1	19707	19746
sp|P06310|KV230_HUMAN_group_Immunoglobulin kappa variable 2-30 OS=Homo sapiens OX=9606 GN=IGKV2-30 PE=3 SV=2	7379.7	4851.4	9839.2	7052.4	2940.5	3669	11254	2500.4	8153.2	9351.9	1912	2110.3	45289	11331	8009.7	28954	3215	17716	9058.9	4097.9	8816.7	8320.2	20227	10268	6476	12466	12395	3329.6	16005	11182	30970	10787	15294	21332	23489	34780
sp|P06454|PTMA_HUMAN_group_Prothymosin alpha OS=Homo sapiens OX=9606 GN=PTMA PE=1 SV=2	3677.7	574.71	391.47	153.63	0	353.97	0	0	906.41	0	1084.7	641.58	2691.5	3070.5	0	0	0	485.84	4468.6	1820.7	898.36	1021	10609	1606.8	1633.7	230.64	905.07	0	397.08	370.37	0	3577.7	4956.2	1625.7	1709.3	6310.6
sp|P07205|PGK2_HUMAN_group_Phosphoglycerate kinase 2 OS=Homo sapiens OX=9606 GN=PGK2 PE=1 SV=3	0	0	248.52	0	0	15872	5627.9	989.47	1311.3	0	1069.6	569.7	858.08	954.68	0	0	0	14937	4684.9	4535.6	1294.1	0	1932.3	900.88	1275	0	801.26	2150.4	397.08	792.43	0	221.92	0	1558.6	0	2590.3
sp|P07225|PROS_HUMAN_group_Vitamin K-dependent protein S OS=Homo sapiens OX=9606 GN=PROS1 PE=1 SV=1	12348	10149	5441	11585	3803.3	20696	9997.5	7791.7	35501	15912	15886	21919	254930	2822.6	6883	7497.7	12851	20160	7564.5	14793	5220.8	17654	49853	12006	14486	41041	2807.7	30449	10843	29892	38033	4543.6	29387	18806	55417	38914
sp|P07437|TBB5_HUMAN_group_Tubulin beta chain OS=Homo sapiens OX=9606 GN=TUBB PE=1 SV=2	0	0	339.25	226.02	0	5261.2	13562	2463.2	4039.4	0	2924	2138.7	995.94	838.51	0	0	205.44	18009	556.54	16554	3261.4	0	6192.9	943.59	1289.8	403.89	1548.8	2182.6	2033.5	355.53	0	1214.8	2273.8	741.51	0	2478
sp|P07477|TRY1_HUMAN_group_Trypsin-1 OS=Homo sapiens OX=9606 GN=PRSS1 PE=1 SV=1	26183	4080.9	245420	132330	0	2250.6	20615	629.26	0	14743	0	0	9806.3	450.46	0	4675.9	24740	7311.6	0	0	1312.2	78694	0	13707	0	2116	0	1449.7	10290	24670	226560	7953.3	3199.8	2938	73096	7622.4
sp|P08238|HS90B_HUMAN_group_Heat shock protein HSP 90-beta OS=Homo sapiens OX=9606 GN=HSP90AB1 PE=1 SV=4	8923.1	32684	382.06	284.86	20194	8512.9	9879.6	14307	23549	10456	8461.9	10040	8449.7	9378.8	9637.1	0	8332.5	26083	13228	11879	4912.6	1002.4	43041	23666	5274.1	4110	13271	25340	9363.1	9735.5	0	3660.6	9370.2	14524	0	2654.1
sp|P08603|CFAH_HUMAN_group_Complement factor H OS=Homo sapiens OX=9606 GN=CFH PE=1 SV=4	100380	25765	15497	12921	27112	39160	9329	7755.1	30609	30496	6794.6	23716	29778	27457	12880	28807	13773	12199	15042	52263	3401.6	14904	27958	15266	22814	7340.3	5750.2	72397	10502	29715	29010	7702.3	38996	3120.2	13786	28589
sp|P08779|K1C16_HUMAN_group_Keratin, type I cytoskeletal 16 OS=Homo sapiens OX=9606 GN=KRT16 PE=1 SV=4	5344.5	4749.5	2695.6	4513.7	12970	9306.9	7739.4	5191.2	22000	5043.6	1355.5	21646	5060	5190.2	8523.1	9795.8	5589	6432.6	3910.7	22921	6432.5	2933.9	12787	5144.3	25764	14241	5940.3	17054	2967.5	5077.8	11642	4390.9	2672.1	2685.8	17184	52175
sp|P0C0L5|CO4B_HUMAN_group_Complement C4-B OS=Homo sapiens OX=9606 GN=C4B PE=1 SV=2	1620	0	708.62	473.18	0	0	0	0	0	5295.8	0	0	0	0	0	10852	0	0	0	0	0	1329.4	0	0	0	0	0	0	0	0	4287.2	0	0	0	5036	0
sp|P0DMV9|HS71B_HUMAN_group_Heat shock 70 kDa protein 1B OS=Homo sapiens OX=9606 GN=HSPA1B PE=1 SV=1	723	0	787.07	1237.4	0	20751	9002.7	4192.1	931.12	0	690.69	3155.2	5568	5581.2	1083.9	0	0	8871.3	2674.6	6649.9	16112	0	29592	14895	1843	304.04	8045.7	11319	478.9	3130.2	0	458.53	2977	7711.9	0	3294.3
sp|P0DOX5|IGG1_HUMAN_group_Immunoglobulin gamma-1 heavy chain OS=Homo sapiens OX=9606 PE=1 SV=2	19967	1325.4	6016.8	37312	0	0	10026	2987.6	0	12462	0	0	10871	935.28	0	8580.5	9280.4	10383	0	0	0	7376.9	0	9493.5	0	696.42	0	0	1808.3	4782.1	34790	1676	0	2296.9	30435	4219.7
sp|P0DOX7|IGK_HUMAN_group_Immunoglobulin kappa light chain OS=Homo sapiens OX=9606 PE=1 SV=1	63076	8437.4	2032.8	19092	2086.2	4326.8	2878.2	2097.5	1723.5	10461	1380.1	3937.5	2758	3262	5712	9212.6	15132	5910.2	3625.7	4485.9	4829.8	1697.1	18303	13719	1167.1	3070.4	3461.3	16640	3753.8	11958	4720.9	7916.7	11706	2892.6	14297	15823
sp|P0DOY3|IGLC3_HUMAN_group_Immunoglobulin lambda constant 3 OS=Homo sapiens OX=9606 GN=IGLC3 PE=1 SV=1	4055400	2031700	76664	225110	644700	46283	168790	246470	165840	776.44	165430	58216	202360	83629	21267	22529	966680	1057300	49478	497420	102190	41769	710570	54769	61383	40331	62289	11701	3398500	3683800	3051.8	268670	36242	81628	99797	64606
sp|P10909|CLUS_HUMAN_group_Clusterin OS=Homo sapiens OX=9606 GN=CLU PE=1 SV=1	17417	5191	9097.9	5571	27681	3781.3	6564.2	6120.1	1228.1	3230.1	1893	3305	3653.7	4045.9	4989.5	56319	25716	22890	1828.7	5322.1	32375	5319.1	2759	2476.2	14013	6410.3	19974	11152	2740.7	3329.6	14770	21425	5922.3	5727.1	49552	16397
sp|P13639|EF2_HUMAN_group_Elongation factor 2 OS=Homo sapiens OX=9606 GN=EEF2 PE=1 SV=4	4950.5	0	663.95	174.12	0	18965	98378	2500.7	13923	0	8230.1	4181.4	5613	11741	1170.6	0	1033.7	3676.4	564.22	18732	6827.2	0	4679.9	8028	2315.9	1331.7	12276	1417.3	354.59	6233.7	0	6354.9	840.48	4693.7	0	6889.9
sp|P13645|K1C10_HUMAN_group_Keratin, type I cytoskeletal 10 OS=Homo sapiens OX=9606 GN=KRT10 PE=1 SV=6	44484	21909	34019	98244	21762	41795	20179	7076.7	20034	22007	14981	41245	40807	25146	51635	35728	40912	33869	34719	25695	12173	17256	21747	16494	34569	7305.6	47760	121190	9598.9	19461	83614	21470	53984	20166	43071	100080
sp|P13647|K2C5_HUMAN_group_Keratin, type II cytoskeletal 5 OS=Homo sapiens OX=9606 GN=KRT5 PE=1 SV=3	29128	6169.2	12574	12776	14437	44073	11899	30974	13624	10617	6347.8	19544	37040	11210	14697	37096	8478.2	23986	15047	12618	14034	13548	18834	15842	13833	14390	10291	46358	13880	13950	36315	48323	26575	29697	427940	47107
sp|P14923|PLAK_HUMAN_group_Junction plakoglobin OS=Homo sapiens OX=9606 GN=JUP PE=1 SV=3	48016	16463	19641	15890	31468	8301.3	37677	16271	15007	3668.5	32477	25003	18631	8007.6	41319	51020	49002	28175	55462	15533	15676	12389	61212	39311	31847	10266	8999.7	12474	41300	52502	52816	18541	23440	9058.2	56539	59044
sp|P15924|DESP_HUMAN_group_Desmoplakin OS=Homo sapiens OX=9606 GN=DSP PE=1 SV=3	102120	45855	21295	23142	36948	24860	71116	57538	19050	18562	13666	34088	23577	3299.2	110120	51559	65352	39132	151370	19667	56147	10804	43122	69555	21644	35026	49782	11548	39169	61190	78167	88688	23594	6483.8	60308	38701
sp|P19823|ITIH2_HUMAN_group_Inter-alpha-trypsin inhibitor heavy chain H2 OS=Homo sapiens OX=9606 GN=ITIH2 PE=1 SV=2	1706.5	249.16	630.19	887.59	0	1214.2	7904.3	838.99	2734.9	0	1611	1786.9	6831.5	1133.9	0	0	1088.4	560.87	4264.9	4053.8	11481	0	25052	2715.5	919.94	755.32	1451.4	1141.6	826.18	861.3	0	3275.6	11573	2675.8	1342.9	3255.6
sp|P20742|PZP_HUMAN_group_Pregnancy zone protein OS=Homo sapiens OX=9606 GN=PZP PE=1 SV=4	58862	26717	5144.8	3683.1	43773	4164.8	6187.4	5857.9	8063.5	5463	10792	8615.6	12908	5557.5	17105	1546.8	35895	40265	9872.6	6545.8	2840.2	2520	11797	6922.3	5243.9	3452.1	3630.5	15053	2533.1	5240.7	6590.5	7498.8	13092	0	2901.6	15304
sp|P23083|HV102_HUMAN_group_Immunoglobulin heavy variable 1-2 OS=Homo sapiens OX=9606 GN=IGHV1-2 PE=1 SV=2	21112	13292	8898.2	9252.5	2093.4	3530.3	10456	2272.7	28057	6248	5965.6	2679.8	22089	0	812.5	6273.2	3715.8	5688	0	1336.3	0	6056.1	6677.8	12135	1268.9	408.91	4408.8	2120.4	2100.7	2165	9027.4	862.56	0	2652.4	39250	10772
sp|P27169|PON1_HUMAN_group_Serum paraoxonase_arylesterase 1 OS=Homo sapiens OX=9606 GN=PON1 PE=1 SV=3	9063.3	5563.3	6149.1	13482	11121	8413.4	6557.7	7923.7	5524.8	2055.8	11374	6991.9	9018.1	1789.5	16725	24749	14731	25037	5475.3	12517	18321	8142.5	5513.2	22563	5204.2	2043.1	0	4553.7	5181	5415.8	14362	9392.2	7775.7	2579.5	16827	23461
sp|P33778|H2B1B_HUMAN_group_Histone H2B type 1-B OS=Homo sapiens OX=9606 GN=H2BC3 PE=1 SV=2	1608.1	0	1250.5	0	394.12	3596.9	65757	5971.8	27420	0	9671.2	8250.3	1520.2	8154.9	2304.9	0	978.54	39709	13461	41018	17396	0	3277.1	3775.2	13535	1534.1	9637.9	11663	4462.8	1674.3	0	1119	1727.2	1558.1	0	15696
sp|P35030|TRY3_HUMAN_group_Trypsin-3 OS=Homo sapiens OX=9606 GN=PRSS3 PE=1 SV=2	27601	287.48	857.28	34848	0	0	2587.7	486.94	0	3238.3	0	0	1338.4	0	0	4023.3	855.55	0	0	0	0	2358.2	0	845.81	0	198.91	0	0	627.34	740.69	14362	0	0	1705.4	5387.8	740.82
sp|P35527|K1C9_HUMAN_group_Keratin, type I cytoskeletal 9 OS=Homo sapiens OX=9606 GN=KRT9 PE=1 SV=3	139680	92960	865100	81465	56638	125100	36391	22496	38418	63499	84166	119440	44709	39137	76534	72952	101230	43454	18595	54530	64129	35495	84381	53666	41328	29770	16356	90787	38642	69237	113810	13884	251520	59757	94418	115780
sp|P35542|SAA4_HUMAN_group_Serum amyloid A-4 protein OS=Homo sapiens OX=9606 GN=SAA4 PE=1 SV=2	20056000	325780	263370	206600	16222	171420000	33597	354380	54190	5751200	15328	2173500	3457000	884080	32916	11425	14571000	28458	33791	530420	49704	35804	3012300	3210.2	1834000	779150	1841600	6178600	39805	457250	33052	151740	2532.2	26281	132130	9288.8
sp|P35908|K22E_HUMAN_group_Keratin, type II cytoskeletal 2 epidermal OS=Homo sapiens OX=9606 GN=KRT2 PE=1 SV=2	127390	16319	47169	64250	56407	87659	42408	63351	46114	24088	34651	25601	16507	7347.2	27220	43588	29627	28386	37699	22389	60796	9884.8	94675	41027	14438	12899	20651	15418	15650	45886	56957	40861	8937.2	18583	361100	23841
sp|P49913|CAMP_HUMAN_group_Cathelicidin antimicrobial peptide OS=Homo sapiens OX=9606 GN=CAMP PE=1 SV=1	10404	4057.8	12326	41954	474240	2290.9	4266.9	7759.1	841.41	1026.3	1842.2	4967.1	1012.6	1041.1	231320	8178.5	10949	36349	13226	1974.1	782.84	1555.6	5709.4	7033	36436	15835	2405.5	3748.4	12365	13377	14105	2033200	5931.3	1188.7	6894.7	2620.9
sp|P55056|APOC4_HUMAN_group_Apolipoprotein C-IV OS=Homo sapiens OX=9606 GN=APOC4 PE=1 SV=1	20351	5697.1	17359	17000	25656	6006.8	78686	2633.3	2718.2	25228	5227	32633	41112	6899.8	6061.2	60981	8499.5	18525	71736	8737.8	3232.2	8802.2	28163	6841.1	5587.1	9630.2	23627	15826	5376	5790.4	6069.1	52630	18110	20058	49932	23763
sp|P59666|DEF3_HUMAN_group_Neutrophil defensin 3 OS=Homo sapiens OX=9606 GN=DEFA3 PE=1 SV=1	23700	1872.1	8366.9	3594.5	16418	11989	7163.6	9694.4	3632.9	438.72	1620.4	3862.7	1117.3	387.59	9202.6	9369.2	3740.2	2652.7	784.2	8317.5	0	2416.7	25186	1781.9	471.79	24613	40745	1885.7	3123.5	828.38	2760.5	20832	451.5	1049.2	24703	24237
sp|P63104|1433Z_HUMAN_group_14-3-3 protein zeta_delta OS=Homo sapiens OX=9606 GN=YWHAZ PE=1 SV=1	3715	0	1938.7	333.55	0	30901	1619.1	4083.6	21830	571.12	6038.8	6164.9	3896.9	2436.1	1822.5	0	271.63	78971	18982	12975	2414.7	4144.5	10797	7717.9	1428.6	350.75	10461	9801	3995.8	5320.8	0	4489.5	1726.4	834.01	0	6025.4
sp|P63261|ACTG_HUMAN_group_Actin, cytoplasmic 2 OS=Homo sapiens OX=9606 GN=ACTG1 PE=1 SV=1	10168	6528.4	7130.1	13894	20115	6894.9	7544.3	2391.7	7692.2	639.24	6025.1	7561.8	3633.9	10728	9208.8	3790.6	17396	40054	16601	17810	6879.8	2444.6	30482	7465.6	5253.9	5964.8	22027	19922	2226.8	6242.6	6194.7	8572.9	7152.4	4184.5	7789.3	8909.6
sp|P68871|HBB_HUMAN_group_Hemoglobin subunit beta OS=Homo sapiens OX=9606 GN=HBB PE=1 SV=2	12278	3140.3	12547	12101	6368.8	7435.6	4271.2	2780.8	1985.1	6877.2	11565	4902.5	66552	4799.4	22146	60154	9183.2	9704	15610	20798	10216	7565.9	6080.6	6711.6	37252	4268.8	5467.3	13336	4776.3	13216	19635	28621	28696	4047.6	72195	21071
sp|P69905|HBA_HUMAN_group_Hemoglobin subunit alpha OS=Homo sapiens OX=9606 GN=HBA1 PE=1 SV=2	13531	7228	5017.8	12668	2903.5	13836	7296.1	2492.4	25057	2665	8747.2	7942.5	20552	8976.4	5054.5	2626.9	22211	12873	3586.5	13056	0	9908.7	13481	3315.5	1453.1	2655.7	11399	28241	10343	7320	83326	7880.2	1501.7	2224.7	133730	12523
sp|P80748|LV321_HUMAN_group_Immunoglobulin lambda variable 3-21 OS=Homo sapiens OX=9606 GN=IGLV3-21 PE=1 SV=2	24322	15700	2774.7	3345.6	2648.8	863.67	2039.3	1381.7	11943	1076.1	2892.6	1705.1	11973	5746	5055.1	0	15704	16371	8254.1	8719.3	9933.4	1139.7	16660	14324	4471.9	1834.4	1922.6	1624.1	7487.4	21478	868.04	12398	15202	544.69	7975.7	5086.5
sp|Q02413|DSG1_HUMAN_group_Desmoglein-1 OS=Homo sapiens OX=9606 GN=DSG1 PE=1 SV=2	30849	38497	11320	21178	15838	12324	33289	35240	638.99	2151.5	13277	10405	29400	7029.8	4604.7	114440	43031	16236	1724.9	1834.1	10036	5366.6	42334	15973	11922	41802	17884	4227.7	14133	33225	25972	19087	15212	35327	9773	52028
sp|Q04695|K1C17_HUMAN_group_Keratin, type I cytoskeletal 17 OS=Homo sapiens OX=9606 GN=KRT17 PE=1 SV=2	67875	22176	365960	19094	20445	12606	16048	21153	34966	17865	12765	29401	36182	5607.8	52012	32014	28750	40431	28869	79201	5981.9	38884	13415	47051	6752.9	12340	11584	12780	14733	21354	116160	11711	7306.5	32135	19151	20979
sp|Q08380|LG3BP_HUMAN_group_Galectin-3-binding protein OS=Homo sapiens OX=9606 GN=LGALS3BP PE=1 SV=1	33400	27088	10540	34422	252880	33576	49677	57349	16896	5652	11232	15280	108980	31814	32061	64172	14641	32775	125270	32380	34696	8975.5	59826	95920	28622	9666.6	46763	81102	20086	33070	90647	32194	33331	13982	21364	26511
sp|Q4LDE5|SVEP1_HUMAN_group_Sushi, von Willebrand factor type A, EGF and pentraxin domain-containing protein 1 OS=Homo sapiens OX=9606 GN=SVEP1 PE=1 SV=3	31841	29329	13882	22298	40798	14010	32055	19583	6910.8	33068	11522	16202	8986.9	27887	25833	60833	22874	22014	14709	10436	11262	19749	28043	22828	20756	33348	12483	93059	11700	26318	20700	24581	16995	10259	71618	59779
sp|Q5D862|FILA2_HUMAN_group_Filaggrin-2 OS=Homo sapiens OX=9606 GN=FLG2 PE=1 SV=1	653.51	544.21	1908.7	9279	1361.7	504.42	1445.5	662.96	0	0	1775.1	2568	950.08	0	5151.5	9409.4	2043.9	2569.9	2448.7	0	2313.8	4156.8	1932.4	563.87	1134.6	3414.1	2054.9	977.85	798.53	1355.5	8204.9	3299.3	0	173.4	17536	1599.7
sp|Q5T749|KPRP_HUMAN_group_Keratinocyte proline-rich protein OS=Homo sapiens OX=9606 GN=KPRP PE=1 SV=1	7341.1	33164	28447	29138	4603.9	2984.8	5708.4	4071.9	14288	1629.4	36220	19741	4328.1	15932	9361.8	22852	3973.2	8355.6	2853.9	7616	3309.7	8931.7	81835	5174.6	2923.1	2657.8	9687.5	30489	8197.6	5767.6	15394	11571	2753.2	10199	43295	15291
sp|Q5VTE0|EF1A3_HUMAN_group_Putative elongation factor 1-alpha-like 3 OS=Homo sapiens OX=9606 GN=EEF1A1P5 PE=5 SV=1	14784	454.32	14029	4230.3	1821.3	55135	20006	17723	14654	353.85	3010.9	23167	9871.9	4250.3	11196	0	581.44	49048	18727	25301	6865.9	553.25	313760	76575	23380	4127.4	36541	4157.4	3687.4	8314.8	0	2097.5	3235.3	29690	0	11118
sp|Q8TF72|SHRM3_HUMAN_group_Protein Shroom3 OS=Homo sapiens OX=9606 GN=SHROOM3 PE=1 SV=2	1245.9	454.26	639.95	216.15	3650.6	17226	7720.5	2411.7	30413	508.82	3102	7051	8191.8	4573.9	25991	0	254.51	19221	2218.9	12950	941.73	0	13511	8346.5	10420	11102	18377	22171	2647	2324.3	0	1436	24585	6812.2	0	2276
sp|Q92954|PRG4_HUMAN_group_Proteoglycan 4 OS=Homo sapiens OX=9606 GN=PRG4 PE=1 SV=3	9255.8	6072.5	20397	1380.5	34957	19945	19572	36543	2030.9	4071.3	11766	2637.9	19314	8512.2	18327	21624	2598.6	47621	4634.6	4543	6203.4	5609	74769	24530	13255	9898.2	14237	30310	2151.6	6458	19530	6026.1	2111.8	9576.2	6279.8	31063
sp|Q99878|H2A1J_HUMAN_group_Histone H2A type 1-J OS=Homo sapiens OX=9606 GN=H2AC14 PE=1 SV=3	1295.8	294.26	732.07	739.92	2477.8	3711	4923	1929.4	5847.4	889.75	2075.4	14532	7633.5	21544	2314.7	0	582.18	22044	23313	11863	3727.2	1672.9	93644	10761	3369.2	3669.2	11608	18671	3295.4	2530.5	0	3581	10012	12993	0	2934
sp|Q9BYE4|SPR2G_HUMAN_group_Small proline-rich protein 2G OS=Homo sapiens OX=9606 GN=SPRR2G PE=3 SV=1	13026	6889.6	1393.2	3344	4510.7	3341.1	58447	1292.1	3624.8	2309.3	741.1	3217.4	3351.3	1106.1	4671.1	4716.7	2637.6	1969.3	1567.5	8992.7	1395.9	1107.2	3657.2	1456.8	6369.8	1831.1	1680	4606.1	1924.1	4266.6	4647.4	5023.7	1884.2	3938.7	38859	11849
sp|Q9Y6R7|FCGBP_HUMAN_group_IgGFc-binding protein OS=Homo sapiens OX=9606 GN=FCGBP PE=1 SV=3	68582	39707	46418	20477	25027	18706	40100	21818	24813	2979.7	13169	7019.1	14307	15416	32351	19202	49675	21743	72713	128610	43456	12881	54584	195650	24357	20292	27797	15960	21976	19856	35788	32010	22150	12544	50154	21874
