# Supplementary material for: Placenta-derived Extracellular Vesicles in Maternal Plasma of Hb Bart’s Fetuses
Source: Research Square preprint supplement (doi:10.21203/rs.3.rs-4163008/v1), 2024-04-17
Supplement: Supplementary file 2 [file 5549fbe1213462528b0366cb.xlsx]

## Sheet: pregnancyoutcome_onlyusedcase
ID	Group	Gasampling_cal(week)	Pregnancy outcome	Gadelivery_cal_week	Mode of delivery	Indication for Forcep or V/E or CS	Birthweight	Sex	Apgar 1 min	Apgar 5 min	Birth injuries	NICU admission
1	2	22.8571	miscarriage	22.8571	Normal vaginal delivery	N/A	593	F	0	0	No	No
2	2	33	stillbirth	27.2857	Normal vaginal delivery	N/A	1045	F	0	0	No	no
3	2	34	Neonatal death	34.7143	C-section	N/A	1610	F	3	4	No	no
4	2	22.7143	TOP	22.7143	NA	NA	NA	NA	NA	NA	NA	NA
5	3	18.2857	miscarriage		NA	NA	NA	NA	NA	NA	NA	NA
6	3	18.2857	TOP	20	NA	NA	NA	NA	NA	NA	NA	NA
7	3	12.1429	TOP	14.7143	NA	NA	NA	NA	NA	NA	NA	NA
8	3	12.2857	TOP		NA	NA	NA	NA	NA	NA	NA	NA
9	3	18.5714	TOP		NA	NA	NA	NA	NA	NA	NA	NA
10	3	12.8571	TOP	14.8571	NA	NA	NA	NA	NA	NA	NA	NA
11	3	12.5714	Stillbirth	26.8571	Normal vaginal delivery		830	M	0	0	no	no
12	4	35.4286	live birth	38.5714	Normal vaginal delivery	N/A	2410	F	9	10	No	No
13	4	34.2857	live birth	34.2857	C-section	N/A	1410	F	7	9	No	Yes
14	4	37.7143	live birth	37.7143	C-section with hysterectomy	N/A	2840	M	3	8	No	no
15	4	21.1429	live birth	27.1429	C-section	N/A	615	M	4	7	No	Yes
16	5	30.1429	stillbirth	30.1429	Normal vaginal delivery	N/A	1790	F	0	0	No	No
17	5	22	TOP	21.5714			2310	F	8	9	No	No
18	5	21	miscarriage	21.7143	Normal vaginal delivery	N/A	336	F	0	0	No	No
19	5	21.2857	Abortion	21.2857	Normal vaginal delivery	N/A	626	F	0	0	No	No
20	5	28.8571	Live birth	34.4286	Normal vaginal delivery		1564	M	8	9	no	Yes
21	1	10.4286	live birth	38.5714	C-section	N/A	2850	F	8	9	No	No
22	1	13.7143	live birth	37.2857	C-section	N/A	3290	M	8	9	No	no
23	1	19.5714	live birth
24	1	12	live birth	38.1429	C-section	overt DM	3240	M	8	9	no	no
25	1	18	live birth	37			2750
26	1	12.8571	live birth	39			3220
27	1	12.2857	live birth	39			2800
